# Supplementary material for: Hepatic SPARC Expression Is Associated with Inflammasome Activation during the Progression of Non-Alcoholic Fatty Liver Disease in Both Mice and Morbidly Obese Patients
Source: MDPI journal article supplement (doi:10.3390/ijms241914843), 2023-10-02
Supplement: s1 [file s1]

**Supplementary Table S1.** Demographic and histopathological characteristics of the public database GSE130970.

| GSE130970 | Variable                     |   | Healthy  | Fatty liver | NASH<br>borderline | NASH        |
|-----------|------------------------------|---|----------|-------------|--------------------|-------------|
|           | n (Total = 78)               |   | 4 (5.1%) | 14 (17.9%)  | 34 (43.6%)         | 26 (33.3%)  |
|           | Sex                          | M | 1 (25%)  | 7 (50%)     | 13 (38%)           | 9 (35%)     |
|           |                              | F | 3 (75%)  | 7 (50%)     | 21 (62%)           | 17 (65%)    |
|           | Age (mean) (SD)              | M | 26 (0.0) | 46.6 (14.9) | 44.9 (10.0)        | 47.1 (14.7) |
|           |                              | F | 62 (2.0) | 54.3 (9.6)  | 49.5 (11.5)        | 57.5 (9.5)  |
|           | NAFLD activity score         |   | 0        | 1 & 2       | 3 & 4              | 5, 6 & 7    |
|           | Steatosis grade              | 0 | 4 (100%) | 4 (29%)     | 0                  | 0           |
|           |                              | 1 | 0        | 9 (64%)     | 18 (53%)           | 2 (8%)      |
|           |                              | 2 | 0        | 1 (7%)      | 13 (38%)           | 13 (50%)    |
|           |                              | 3 | 0        | 0           | 3 (9%)             | 11 (42%)    |
|           | Lobular inflammation grade   | 0 | 4 (100%) | 4 (29%)     | 1 (3%)             | 0           |
|           |                              | 1 | 0        | 9 (64%)     | 30 (88%)           | 18 (69%)    |
|           |                              | 2 | 0        | 1 (7%)      | 3 (9%)             | 8 (31%)     |
|           | Cytological ballooning grade | 0 | 4 (100%) | 13 (93%)    | 12 (35%)           | 1 (4%)      |
|           |                              | 1 | 0        | 1 (7%)      | 15 (44%)           | 7 (27%)     |
|           |                              | 2 | 0        | 0           | 7 (21%)            | 18 (69%)    |
|           | Fibrosis stage               |   |          |             |                    |             |
|           |                              | 0 | 4 (100%) | 10 (71.5%)  | 11 (32%)           | 1 (4%)      |
|           |                              | 1 | 0        | 3 (21.5%)   | 13 (38%)           | 12 (46%)    |
|           |                              | 2 | 0        | 1 (7%)      | 4 (12%)            | 4 (15%)     |
|           |                              | 3 | 0        | 0           | 5 (15%)            | 8 (31%)     |
|           |                              | 4 | 0        | 0           | 1 (3%)             | 1 (4%)      |

Demographic data of patients with NAFLD from RNAseq database GSE130970 (<http://www.ncbi.nlm.nih.gov/geo/>). The table shows number of patients per group (n), sex (M: male, F: female), and age. Histopathological variables provide NAFLD activity score (steatosis grade, lobular inflammation grade and cytological ballooning grade), and fibrosis stage. Results given as mean  $\pm$  SD or n (%).
