# Supplementary material for: Hepatic SPARC Expression Is Associated with Inflammasome Activation during the Progression of Non-Alcoholic Fatty Liver Disease in Both Mice and Morbidly Obese Patients
Source: MDPI journal article supplement (doi:10.3390/ijms241914843), 2023-10-02
Supplement: s1 [file s1]

**Supplementary Table S2.** Demographic, histopathological and biochemical comparisons between low and high subgroup patients.

|                       | SPARC       |             | CASP1       |            | IL1-b       |             | AKR1B10    |            | FABP5       |              |
|-----------------------|-------------|-------------|-------------|------------|-------------|-------------|------------|------------|-------------|--------------|
|                       | Low         | High        | Low         | High       | Low         | High        | Low        | High       | Low         | High         |
| <b>n</b>              | 36          | 29          | 33          | 32         | 36          | 28          | 35         | 30         | 32          | 33           |
| <b>Sex</b>            | M:21 F:15   | M:14 F:15   | M:16 F:16   | M:13 F:19  | M:26 F:16   | M:14 F:14   | M:24 F:11  | M:11 F:19  | M:18 F:14   | M:17 F:16    |
| <b>Age (SD)</b>       | 46.4 (14.4) | 46.9 (11.3) | 47 (10)     | 45.9 (9.5) | 46.75 (8.7) | 46.2 (11.1) | 47.7 (9.3) | 45 (10.2)  | 46.25 (9.3) | 46.67 (10.3) |
| <b>IMC (SD)</b>       | 40.8 (5.8)  | 41.97 (8.6) | 40.61 (5.5) | 42.1 (9.5) | 39.81 (5.3) | 43.5 (8.6)  | 41.3 (6.8) | 41.3 (7.6) | 40.87 (5.6) | 41.76 (8.4)  |
| <b>NAFLD score</b>    | 3 (7)       | 3.5 (7)     | 3.5 (7)     | 3 (7)      | 4 (7)       | 3 (7)       | 4 (7)      | 3 (6)      | 4 (6)       | 3 (7)        |
| <b>Fibrosis score</b> | 1 (4)       | 1 (3)       | 1 (4)       | 1 (4)      | 1 (4)       | 1 (3)       | 1 (4)      | 1 (3)      | 1 (4)       | 1 (3)        |
| <b>AlbG (g/dL)</b>    | 3.9±0.1     | 4.0±0.1     | 4.0±0.1     | 3.9±0.1    | 4.0±0.1     | 3.9±0.1     | 4.1±0.1    | 3.8±0.1    | 4.1±0.1     | 3.9±0.1      |
| <b>AlkP (U/L)</b>     | 46.7±4.3    | 55.5±4.7    | 53.9±4.2    | 53.6±4.8   | 53.9±4.8    | 52.9±4.3    | 52.4±4.4   | 55.5±4.6   | 52.3±3.8    | 55.1±5.1     |
| <b>ALT (U/L)</b>      | 12.2±3.7    | 12.8±1.5    | 20.7±3.6    | 12.4±1.5   | 19.6±3.4    | 13.9±2.2    | 19.0±2.4   | 13.6±3.5   | 22.0±3.6    | 11.3±1.5     |
| <b>AST (U/L)</b>      | 32.7±5      | 44.8±7.5    | 46.5±6.6    | 39.0±6.0   | 52.9±7.6    | 32.7±3.5    | 47.7±5.6   | 36.4±7.2   | 50.0±6.5    | 35.7±5.9     |
| <b>BilD (mg/dL)</b>   | 0.2±0.1     | 0.2±0.0     | 0.3±0.0     | 0.2±0.0    | 0.2±0.0     | 0.3±0.0     | 0.2±0.0    | 0.3±0.0    | 0.2±0.0     | 0.3±0.0      |
| <b>BiliT (mg/dL)</b>  | 0.5±0.1     | 0.6±0.0     | 0.6±0.1     | 0.6±0.1    | 0.6±0.1     | 0.6±0.1     | 0.6±0.1    | 0.6±0.1    | 0.6±0.1     | 0.6±0.1      |
| <b>Chol (mg/dL)</b>   | 140.1±6.6   | 140.7±6.1   | 146.6±5.9   | 142.3±6.9  | 148.5±6.5   | 141.2±6.3   | 147.3±5.3  | 140.9±7.8  | 152.4±6.0   | 136.7±6.5    |
| <b>GluC (mg/dL)</b>   | 111.4±6.9   | 111.9±4.8   | 118.6±6.1   | 113.7±5.8  | 116.9±5.9   | 116.2±6.3   | 120.9±5.7  | 110.1±6.1  | 126.8±6.2   | 105.7±5.1    |
| <b>TP (g/dL)</b>      | 7.2±0.2     | 7.6±0.3     | 7.3±0.3     | 7.4±0.3    | 7.6±0.3     | 7.1±0.1     | 7.7±0.2    | 7.0±0.3    | 7.5±0.2     | 7.2±0.3      |
