# Supplementary material for: Hepatic SPARC Expression Is Associated with Inflammasome Activation during the Progression of Non-Alcoholic Fatty Liver Disease in Both Mice and Morbidly Obese Patients
Source: MDPI journal article supplement (doi:10.3390/ijms241914843), 2023-10-02
Supplement: s1 [file s1]

**Supplementary Table S3.** Primers sequences information.

| Primers            | Sequence 5' → 3'                            |
|--------------------|---------------------------------------------|
| mGapdh – Fw        | (DNA)- GGG GCT GCC CAG AAC ATC AT           |
| mGapdh – Rv        | (DNA)- GCC TGC TTC ACC ACC TTC TTG          |
| mSparc – Fw        | (DNA)- CCA CAC GTT TCT TTG AGA CC           |
| mSparc – Rv        | (DNA)- GAT GTC CTG CTC CTT GAT GC           |
| mNlrp3 – Fw        | (DNA)- TGC TCT TCA CTG CTA TCA AGC<br>CCT   |
| mNlrp3 – Rv        | (DNA)- ACA AGC CTT TGC TCC AGA CCC<br>TAT   |
| mCaspase1 – Fw     | (DNA)- TGG CTT CTT ATT GGC ACG AT           |
| mCaspase1 – Rv     | (DNA)- TGG TCT TGT GAC TTG GAG GA           |
| mIl-1 $\beta$ – Fw | (DNA)- TGA CAG TGA TGA GAA TGA<br>CCT GTT C |
| mIl-1 $\beta$ – Rv | (DNA)- TTG GAA GCA GCC CTT CAT CT           |
| 18s – Fw           | (DNA)- ACC GCA GCT AGG AAT AAT GGA          |
| 18s – Rv           | (DNA)- GCC TCA GTT CCG AAA ACC A            |
| hSPARC – Fw        | (DNA)- AAA CCG AAG AGG AGG TGG TG           |
| hSPARC – Rv        | (DNA)- GCA AAG AAG TGG CAG GAA GA           |
| hNLRP3 – Fw        | (DNA)- GAT CTT CGC TGC GAT CAA CAG          |
| hNLRP3 – Rv        | (DNA)- TCA ATG CTG TCT TCC TGG CA           |
| hCASPASE1 – Fw     | (DNA)- GTG CAG GAC AAC CCA GCT AT           |
| hCASPASE1 – Rv     | (DNA)- TGC GGC TTG ACT TGT CCA TT           |
| hIL-1 $\beta$ – Fw | (DNA)-CCT CCA GGG ACA GGA TAT GGA           |
| hIL-1 $\beta$ – Rv | (DNA)-TTT CAA CAC GCA GGA CAG GTA           |
| hAKR1B10 – Fw      | (DNA)- GTA ACG TGT TGC AAT CCT CT           |
| hAKR1B10 – Rv      | (DNA)- GAC ATG AGT GGA GGT AGT CA           |
| hFABP5 – Fw        | (DNA)- TTT GAT GAA TAC ATG AAG GAG<br>CTA   |
| hFABP5 – Rv        | (DNA)- GTG ATG ATA CAA TCT GGC TTG<br>G     |
